# Supplementary material for: Imipramine Protects against Bone Loss by Inhibition of Osteoblast-Derived Microvesicles
Source: Int J Mol Sci. 2017 May 8;18(5):1013. doi: 10.3390/ijms18051013 (PMC5454926; doi:10.3390/ijms18051013)
Supplement: Supplementary file 1 [file ijms-18-01013-s001.pdf]

# Supplementary Materials: Imipramine Protects against Bone Loss by Inhibition of Osteoblast-Derived Microvesicles

Lili Deng, Ying Peng, Yuhai Jiang, Yu Wu, Yuedi Ding, Yaping Wang, Dong Xu and Qiang Fu

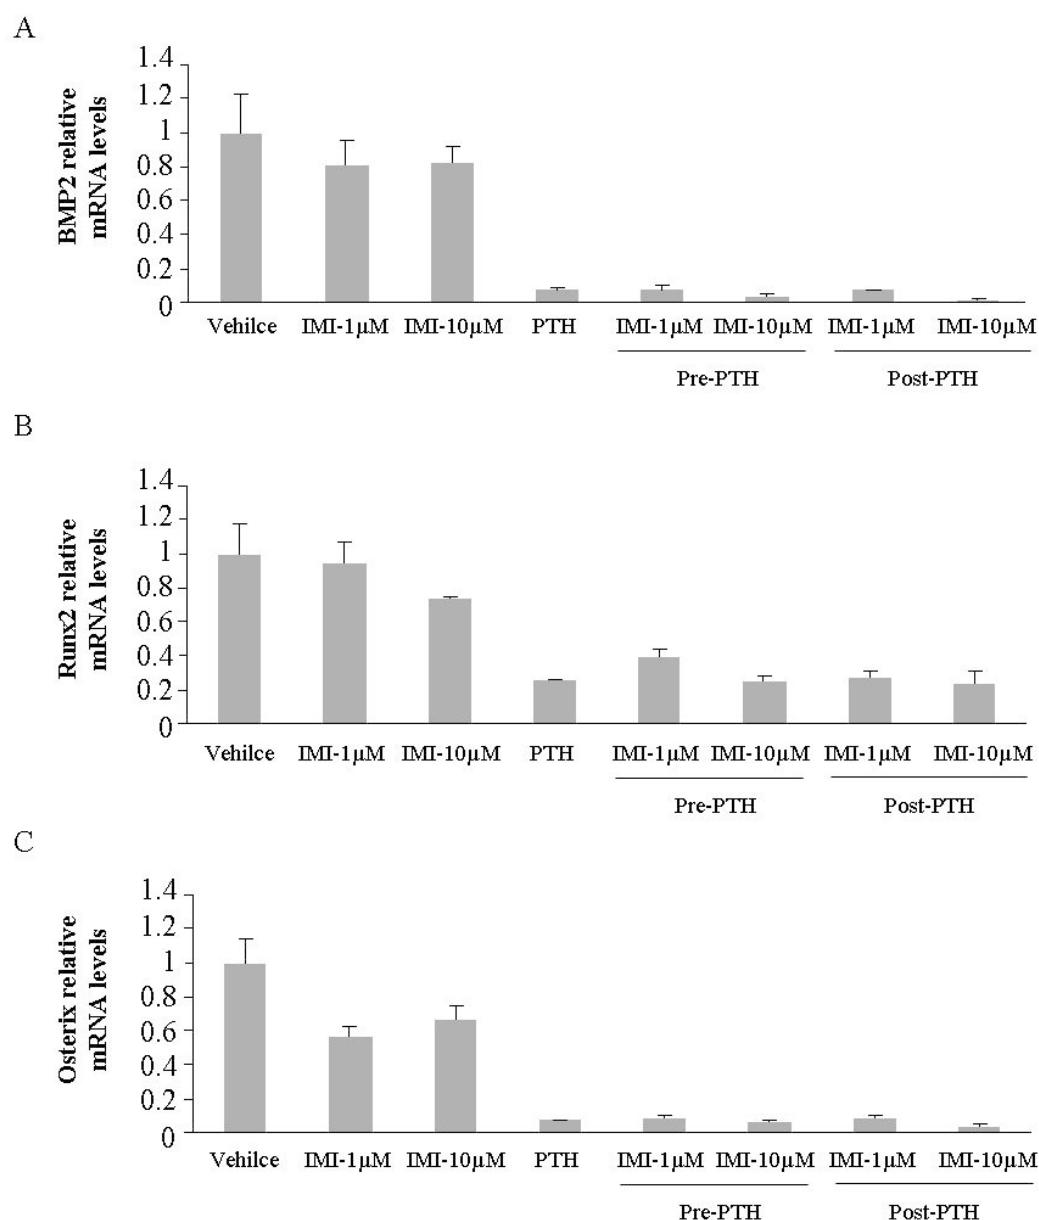

**Figure S1.** Imipramine regulates genes expression in osteoblast. (A) mRNA expression for BMP2; (B) mRNA expression for Runx2; (C) mRNA expression for Osterix. Each bar represents the mean  $\pm$  STDEV ( $n = 3$ ). Vehicle: without any treatments; IMI: with imipramine treatment; PTH: with PTH treatment; Pre-PTH: imipramine pre-treated one hour and then PTH treatment; Post-PTH: PTH pre-treated one hour and then imipramine treatment.
